# Supplementary material for: Structural Organization of S516 Group I Introns in Myxomycetes
Source: MDPI journal article supplement (doi:10.3390/genes13060944), 2022-05-25
Supplement: s1 [file s1]

Figure S1. Sequence alignment of core structure nucleotides of myxomycete S516 introns

# INTRON

|                       | <IGS>           | <<<P3>>>     | <<P4>>       | <<P5>      | <<<P5a>>>>             |              |
|-----------------------|-----------------|--------------|--------------|------------|------------------------|--------------|
| Dalp.S516_ON155994    | CTGGTTAGAGGCCAG | GTACAGATGTA  | AAATTCGAGG   | AAACCTCTGG | AGTCATAGCTACCGGT       | AATAACGCTAT  |
| Dniv.S516-1_HE614615  | CTGGTGGACGCCAG  | GTACAGATGTA  | AAATTCGAGG   | GACGTCTGA  | AGTCACGAATACCGGT       | AATAACGTCGT  |
| Dniv.S516-2_HE614616  | CTGGTGGACGCCAG  | GTACAGATGTA  | AAATTCGAGG   | GACGTCTGA  | AGTCACGAATACCGGT       | AATAACGTCGT  |
| Dniv.S516-3_HE614617  | CTGGTGGACGCCAG  | GTACAGATGTA  | AAATTCGAGG   | GACGTCTGA  | AGTCACGAATACCGGT       | AATAACGTCGT  |
| Dsou.S516_MZ313549    | CTGGTTGTAGGCCAG | GTACGGACGTAA | AACTGCGAG    | AAACCTCTGG | AGCCTAGGCTACCGGT       | AACAACGCCTA  |
| LCru.S516_HE614619    | CTGGTTGAAAGCCAG | GTACAGCCGTA  | AGTTGCGGG    | GAAAGCCAG  | TGGGGGGGACTACCGGT      | AACAAAAGCCCC |
| Dsp.S516*_DQ903678    | CTGGTGGAAAGCCAG | GTACAGATGTA  | AAATTCGAGG   | GACGTCTGG  | AGTCATGACTACCGGT       | AATAACGTTAT  |
| Bgra.S516_AJ555451    | CTGGTTATAGGCCAG | GTACAGTTGTA  | AAATTCGCGG   | GAAACCCAG  | TGATTGGACTACCGGT       | AATAACGTCCA  |
| Flev.S516_DQ903676    | CTGGTTACAGGCCAG | GTACAGCCGTA  | AAATTCGAGG   | GAAACCCAG  | TGACTGGGCTACCGGT       | AACAATGCTCA  |
| Fsep.S516-1_AJ584697  | CTGGTAAATGCCAG  | GTACAGCTGTA  | AAATTCGCGG   | GAAAGCCAG  | TGGGAAAGCTACCGGT       | AACAATGCGAT  |
| Fsep.S516-2_MF983561  | CTGGTGTATGCCAG  | GTACAGCTGTA  | AAATTCGCGG   | GAAAGCCAG  | TGGGAAAGCTACCGGT       | AACAATGCGAT  |
| Fsep.S516-3_AJ555452  | CTGGTAAATGCCAG  | GTACAGCTGTA  | AAATTCGCGG   | GAAAGCCAG  | TGGGAAAGCTACCGGT       | AACAATGCGAT  |
| Ecer.S516_JQ031967    | CTGGTTTATGCCAG  | GTACAGCTGTA  | AAATTCGCGG   | GAAAGCCAG  | TGGGAAAGCTACCGGT       | AATACTGTTGA  |
| Pfla.S516_AJ555453/4  | CTGGTTGAAAGCCAG | GTACACGCGTA  | AAATTCGCGG   | GAAAGCCAG  | TGGGAAAGCTACCGGT       | AAAACCATGGA  |
| Pnot.S516_JX035988    | CTGGTTGGATGCCAG | GTACATTGTA   | AAATTCGCGG   | GAAAGCCAG  | TGGGAGTGCCACCGGT       | AACAGCGCAT   |
| Psp.S516-1_JX035984   | CTGGTGGACGCCAG  | GTACAGCTGTA  | AAATTCGCGG   | GAAAGCCAG  | TGGGAAAGCTACCGGT       | AACAACGTCCA  |
| Psp.S516-2_MK336180   | CTGGTTGTAGGCCAG | GTACGACTGTA  | AAATTCGAGG   | GAAAGCCAG  | TGGGCGTAGATACCGGT      | GATAATGCTAC  |
| Cana.S516_JQ031961    | CTGGTTGAAAGCCCG | GTACAGCTTTAA | AACTGCAAG    | GAAAGCCAG  | TGAAGCGGATACCGGT       | TATAACGCCGC  |
| Cnig.S516-1_DQ903685  | CTGGTGGACGCCAG  | GTACAGCTGTA  | AAATTCGAGG   | GAAAGCCAG  | TGCTGGGTGATCGACTACCGGT | AATAACGTCGG  |
| Cnig.S516-2_AY643824  | CTGGTGGACGCCAG  | GTACACTTGTA  | AAATTCGCGG   | GAAAGCCAG  | TGAGGTGGGTACCGGT       | AAAAACCCCCG  |
| Cpse.S516_DQ903673    | CTGGTTGTTGCCAG  | GTACAGCTGTA  | AAATTCGAGG   | GAAAGCCAG  | TGGAGCGGATACCGGT       | TATAACGCTGC  |
| Cocu.S516_JQ031959    | CTGGTTAAAGGCCAG | GTACAGCTGTA  | AAATTCGAGG   | GAAAGCCAG  | TGGGATAGAGACCGGT       | AACAGGCTCTA  |
| Crob.S516_JQ031960    | CTGGTTAAGGCCAG  | GTACACTGTA   | AAATTCGCGG   | GAAAGCCAG  | TGGGATCAAGCTACCGGT     | AATAAGGCTTG  |
| Dpau.S516_JQ031966    | CTGGTTAGAGGCCAG | GTACAGTTGTA  | AAATTCGCGG   | GAAAGCCAG  | TGGGATCAAGCTACCGGT     | AAAAGCCTGTG  |
| Laca.S516_JQ031968    | CTGGTTAAAGGCCAG | GTACAGTTGTA  | AAATTCGCGG   | GAAAGCCAG  | TGGGATCAAGCTACCGGT     | AATAGCCTGCA  |
| Laen.S516-1_JQ031969  | CTGGTTACAGGCCAG | GTACAGTTGTA  | AAATTCGCGG   | GAAAGCCAG  | TGGGCAAGCTACCGGT       | AATAGCTGTG   |
| Laen.S516-2_JQ031970  | CTGGTTACAGGCCAG | GTACAGTTGTA  | AAATTCGCGG   | GAAAGCCAG  | TGGGCAAGCTACCGGT       | AATAGCTGTG   |
| Laib.S516_JQ031971    | CTGGTTGGAGGCCAG | GTACAGTTGTA  | AAATTCGCGG   | GAAAGCCAG  | TGGGCAAGCTACCGGT       | AACAGCTGTG   |
| Lcol.S516-1_HQ687204  | CTGGTTACAGGCCAG | GTACAGTTGTA  | AAATTCGCGG   | GAAAGCCAG  | TGGGCAAGCTACCGGT       | AATAGCTGTG   |
| Lcol.S516-2_HQ687196  | CTGGTCCGGGCCAG  | GTACACTTGTA  | AAATTCGAGG   | GAAAGCCAG  | TGGGCAAGCTACCGGT       | AATAGCTGTG   |
| Lcol.S516-3_HQ687198  | CTGGTGAACGCCAG  | GTACATTGTA   | AAATTCGAGG   | GAAAGCCAG  | TGGGCAAGCTACCGGT       | AATAACGCTGA  |
| Lcol.S516-4_HQ687199  | CTGGTACTTCTGTG  | TACCTCGTA    | AAATTCGAGG   | AAAAAGCCTT | AAGGAAGGACCCCGGT       | AACAGGCTCT   |
| Lcol.S516-5_HQ687197  | CTGGTTATAGGCCAG | GTACCTTGTAA  | AAATTCGCGG   | AAAAAGCCTT | AAGGAAGGACCCCGGT       | AATAATGCTGG  |
| Lcol.S516-6_HQ687200  | CTGGTTACAGGCCAG | GTACAGTTGTA  | AAATTCGCGG   | GAAAGCCAG  | TGGGCAAGCTACCGGT       | AATAGCCTGTC  |
| Lech.S516-1_JQ031980  | CTGGTGAGCGGCCAG | GTACAGATGTA  | AAATTCGAGG   | GAAAGCCAG  | TGCTGGGTGAACGGATACCGGT | AAGAATTCCTT  |
| Lech.S516-2_JQ031979  | CTGGTGAGCGGCCAG | GTACAGATGTA  | AAATTCGAGG   | GAAAGCCAG  | TGCTGGGTGAACGGATACCGGT | AAGAATTCCTT  |
| Lpse.S516_JQ031985    | CTGGTTGGAGGCCAG | GTACAAITGTA  | AAAAATTCGCGG | GAAAGCCAG  | TGGGAAACACCCCGGT       | AAAAACCTTTT  |
| Lpun.S516_HQ687194    | CTGGTGTACGCCAG  | GTACACTCGTA  | AAATTCGCGG   | GAAAGCCAG  | TGGGAAAGGACCCCGGT      | AACAGGCTCTT  |
| Lsp.S516_JQ031994     | CTGGTTACAGGCCAG | GTACAACTGTA  | AAATTCGAGG   | AAAAAGCCAG | TGGGTGCGAGACCGGT       | AATAGCTGCA   |
| Mobl.S516_DQ903682    | CTGGTAGTTGCCAG  | GTACACTTGTA  | AAATTCGCGG   | AAAAAGCCAG | TGGGTGCGAGACCGGT       | ACATCGCACAC  |
| Magg.S516_DQ903669    | CTGGTTGGAGGCCAG | GTACAGTTGTA  | AAATTCGCGG   | GAAAGCCAG  | TGGGTGCGAGACCGGT       | AATAATGCTATG |
| Mcri.S516_JQ032000    | CTGGTTCTCGGCCAG | GTACAGTTGTA  | AAATTCGCGG   | AAAAAGCCTT | TGGGGGTGTTGGTACCGGT    | AATAATCCAAC  |
| Sfus.S516-1_MK041079  | CTGGTCAACGCCAG  | GTACAACTGTA  | AAATTCGAGG   | GAAAGCCAG  | TGGGTGGAAGTACCGGT      | TACAATCTTCC  |
| Sfus.S516-2_MK041078  | CTGGTGGACGCCAG  | GTACAACTGTA  | AAATTCGAGG   | GAAAGCCAG  | TGGGTGGAAGTACCGGT      | AACAATCTTCA  |
| Lpar.S516_JX481297    | CTGGTGGACGCCAG  | GTACAGTTGTA  | AAATTCGAGG   | GAAAGCCAG  | TGGGTGGAAGTACCGGT      | AACAATCTTCA  |
| Rlyc.S516_JX481311    | CTGGTTGCAGGCCAG | GTACGCTCGTA  | AAATTCGCGG   | AAGGATGGG  | TGTGGGCTACCGGT         | AAAAACGGCCT  |
| Agto.S516_JX481282    | CTGGTTACAGGCCAG | GTACAGTTGTA  | AAATTCGAGG   | GAAAGCCAG  | TGGTTGAGCTACCGGT       | AACAACGCTGT  |
| Tdec.S516_FJ810499    | CTGGTTATAGGCCAG | GTACAACTGTA  | AAATTCGAGG   | GAAAGCCAG  | TGGGTGGAAGTACCGGT      | AAAAACGCTAT  |
| Tvar.S516-1_KM495030  | CTGGTTGTAGGCCAG | GTACAGCTGTA  | AAATTCGAGG   | GAAAGCCAG  | TGGGTGGAAGTACCGGT      | GACAACGCCAC  |
| Tvar.S516-2_KM495011  | CTGGTTGTAGGCCAG | GTACAGCTGTA  | AAATTCGAGG   | GAAAGCCAG  | TGGGTGGAAGTACCGGT      | GACAACGCCAC  |
| Tvar.S516-3_KM495025  | CTGGTTGTAGGCCAG | GTACAGCTGTA  | AAATTCGAGG   | GAAAGCCAG  | TGGGTGGAAGTACCGGT      | GACAACGCCAC  |
| Tvar.S516-4_KM495027  | CTGGTTGTAGGCCAG | GTACAGCTGTA  | AAATTCGAGG   | GAAAGCCAG  | TGGGTGGAAGTACCGGT      | GACAACGCCAC  |
| Tvar.S516-5_KM495026  | CTGGTTGTAGGCCAG | GTACAGCTGTA  | AAATTCGAGG   | GAAAGCCAG  | TGGGTGGAAGTACCGGT      | GACAACGCCAC  |
| Tvar.S516-6_KM495022  | CTGGTTGTAGGCCAG | GTACAGCTGTA  | AAATTCGAGG   | GAAAGCCAG  | TGGGTGGAAGTACCGGT      | GACAACGCCAC  |
| Tvar.S516-7_KM495010  | CTGGTTGTAGGCCAG | GTACAGCTGTA  | AAATTCGAGG   | GAAAGCCAG  | TGGGTGGAAGTACCGGT      | GACAACGCCAC  |
| Tvar.S516-8_KM495009  | CTGGTTGTAGGCCAG | GTACAGCTGTA  | AAATTCGAGG   | GAAAGCCAG  | TGGGTGGAAGTACCGGT      | GACAACGCCAC  |
| Tvar.S516-9_KM494999  | CTGGTTGTAGGCCAG | GTACAGCTGTA  | AAATTCGAGG   | GAAAGCCAG  | TGGGTGGAAGTACCGGT      | GACAACGCCAC  |
| Tvar.S516-10_KM495017 | CTGGTTGTAGGCCAG | GTACAGCTGTA  | AAATTCGAGG   | GAAAGCCAG  | TGGGTGGAAGTACCGGT      | GACAACGCCAC  |
| Tvar.S516-11_KM495008 | CTGGTTGTAGGCCAG | GTACAGCTGTA  | AAATTCGAGG   | GAAAGCCAG  | TGGGTGGAAGTACCGGT      | GACAACGCCAC  |
| Tvar.S516-12_KM494996 | CTGGTTGCAGGCCAG | GTACAGCTGTA  | AAATTCGAGG   | GAAAGCCAG  | TGGGTGGAAGTACCGGT      | GATAACGCTGC  |
| Tvar.S516-13_KM495029 | CTGGTTGTAGGCCAG | GTACAGCTGTA  | AAATTCGAGG   | GAAAGCCAG  | TGGGTGGAAGTACCGGT      | GACAACGCCAC  |
| Tvar.S516-14_KM495023 | CTGGTTGTAGGCCAG | GTACAGCTGTA  | AAATTCGAGG   | GAAAGCCAG  | TGGGTGGAAGTACCGGT      | GACAACGCCAC  |
| Tvar.S516-15_KM495012 | CTGGTTGTAGGCCAG | GTACAGCTGTA  | AAATTCGAGG   | GAAAGCCAG  | TGGGTGGAAGTACCGGT      | GACAACGCCAC  |
| Tvar.S516-16_KM495024 | CTGGTTGTAGGCCAG | GTACAGCTGTA  | AAATTCGAGG   | GAAAGCCAG  | TGGGTGGAAGTACCGGT      | GACAACGCCAC  |
| Tvar.S516-17_KM495021 | CTGGTTGTAGGCCAG | GTACAGCTGTA  | AAATTCGAGG   | GAAAGCCAG  | TGGGTGGAAGTACCGGT      | GACAACGCCAC  |
| Tvar.S516-18_KM494993 | CTGGTGGTAGGCCAG | GTACACCGTAA  | ATTCGAGG     | GAAAGCCAG  | TGGGAGCAGATACCGGT      | GATAACGCTGC  |
| Tvar.S516-19_KM495013 | CTGGTTGTAGGCCAG | GTACAGCTGTA  | AAATTCGAGG   | GAAAGCCAG  | TGGGTGGAAGTACCGGT      | GACAACGCCAC  |
| Tvar.S516-20_KM495007 | CTGGTTGTAGGCCAG | GTACAGCTGTA  | AAATTCGAGG   | GAAAGCCAG  | TGGGTGGAAGTACCGGT      | GACAACGCCAC  |
| Tvar.S516-21_KM495006 | CTGGTTGTAGGCCAG | GTACAGCTGTA  | AAATTCGAGG   | GAAAGCCAG  | TGGGTGGAAGTACCGGT      | GACAACGCCAC  |
| Tvar.S516-22_KM495005 | CTGGTTGTAGGCCAG | GTACAGCTGTA  | AAATTCGAGG   | GAAAGCCAG  | TGGGTGGAAGTACCGGT      | GACAACGCCAC  |
| Tvar.S516-23_KM495031 | CTGGTTGTAGGCCAG | GTACAGCTGTA  | AAATTCGAGG   | GAAAGCCAG  | TGGGTGGAAGTACCGGT      | GACAACGCCAC  |
| Tvar.S516-24_KM494995 | CTGGTGGTAGGCCAG | GTACACCGTAA  | ATTCGAGG     | GAAAGCCAG  | TGGGAGCAGATACCGGT      | GATAACGCTGC  |
| Tvar.S516-25_KM494994 | CTGGTGGTAGGCCAG | GTACACCGTAA  | ATTCGAGG     | GAAAGCCAG  | TGGGAGCAGATACCGGT      | GATAACGCTGC  |
| Dniv.S516_JX481289    | CTGGTCAAGGCCAG  | GTACACCGGAA  | ATTAACCG     | GAAAGCCAG  | TGGGAGCAGATACCGGT      | GATAACGCTGC  |
| Ecoe.S516_AY842033    | CTGGTTACAGGCCAG | GTACAAITGTA  | AAAAATTCGCGG | AAAAAGCCAG | TGGGAAAGCTACCGGT       | AAAAACGCTCT  |

# INTRON

|              | P5a>  | <P5>>   | <<P4>><<P6>> | <<P7>>> | <<P3>>><<P8>> | <<P7>>    |              |               |           |            |             |
|--------------|-------|---------|--------------|---------|---------------|-----------|--------------|---------------|-----------|------------|-------------|
| Dalp.S516    | GGCA  | CCAGACA | AA           | TCGGCA  | GCCCGTT       | CAGAGACTA | TAAT         | CGTCTGGGCGCT  | TAAGGAA   | TAGTCC     | ATTAGGCCAG  |
| Dniv.S516-1  | GGCA  | CCAGAT  | AA           | TCGGCA  | GCCCGTT       | CAGAGACTA | TAAT         | CATCTGGGCGCT  | TAAGGAA   | TAGTCC     | ATTAGGCCAG  |
| Dniv.S516-2  | GGCA  | CCAGAT  | AA           | TCGGCA  | GCCCGTT       | CAGAGACTA | TAAT         | CATCTGGGCGCT  | TAAGGAA   | TAGTCC     | ATTAGGCCAG  |
| Dniv.S516-3  | GGCA  | CCAGAT  | AA           | TCGGCA  | GCCCGTT       | CAGAGACTA | TAAT         | CATCTGGGCGCT  | TAAGGAA   | TAGTCC     | ATTAGGCCAG  |
| Dsou.S516    | TGGCC | CCAGACA | AA           | TCGGCA  | GCCCGTT       | CAGAGACTA | TAAT         | CGTCCGGGCGCT  | CAAGGAA   | TAGTCC     | ATTAGGCCAG  |
| Lcru.S516    | TTCA  | CTGGTCA | AA           | TCGGCA  | GCCCGTT       | CAGAGACTA | TAAT         | CGGTTGGGCGCT  | TAAAGGAA  | TAGTCC     | ACTGGGCCAG  |
| Dsp.S516*    | GGCA  | TCAGAT  | AA           | TCGGCA  | GCCCGTT       | CAGAGACTA | TAAT         | CATCTGGGCGCT  | TAAGGAA   | TAGTCC     | ATTAGGCCAG  |
| Bgra.S516    | CTCA  | CTGGTCA | AA           | TCGGCA  | GCCCGTT       | CAGAGACTA | TAAT         | CGACTGGGCGCT  | TAAGGAA   | TAGTCC     | ACTGGGCCAG  |
| Flev.S516    | CTCA  | CTGGTCA | AA           | TCGGCA  | GCCCGTT       | CAGAGACTA | TAAT         | CGGTTGGGCGCT  | TAAAGGAA  | TAGTCC     | ACTGGGCCAG  |
| Fsep.S516-1  | CCAG  | CTGGCCA | AA           | TCGGCA  | GCCCGTT       | CAGAGACTA | TAAT         | CAGTTGGGCGCT  | TAAAGGAA  | TAGTCC     | ACTGGGCCAG  |
| Fsep.S516-2  | CCCA  | CTGGCCA | AA           | TCGGCA  | GCCCGTT       | CAGAGACTA | TAAT         | CAGTTGGGCGCT  | TAAAGGAA  | TAGTCC     | ACTGGGCCAG  |
| Fsep.S516-3  | CCAG  | CTGGCCA | AA           | TCGGCA  | GCCCGTT       | CAGAGACTA | TAAT         | CAGTTGGGCGCT  | TAAAGGAA  | TAGTCC     | ACTGGGCCAG  |
| Ecer.S516    | TTCCC | CAGTCA  | AA           | TCGGCA  | GCCCGTT       | CAGAGACTA | TAAT         | CGAGTGGGGTCT  | TAATGTA   | TAGTCC     | ACTGGGCCAG  |
| Pfla.S516    | TTCGT | CAGTCA  | AA           | TCGGCA  | GCCCGTT       | CAGAGACTA | TAAT         | CGTGTGGGTCT   | TAAAGTA   | TAGTCC     | ACTGGGCCAG  |
| Phot.S516    | CTCA  | CAGTCA  | AA           | TCGGCA  | GCCCGTT       | CAGAGACTA | CAAT         | CGAATGGGGCT   | TAAAGTA   | TAGTCC     | ACTGGGCCAG  |
| Psp.S516-1   | CTCA  | CTGGTCA | AA           | TCGGCA  | GCCCGTT       | CAGAGACTA | TAAT         | CAACTGGGCGCT  | TAAAGGAA  | TAGTCC     | ACTGGGCCAG  |
| Psp.S516-2   | GCTC  | CTAGCCA | AA           | TCTGCA  | GCCCGTT       | CAGAGACTA | TAAT         | CAGTTGGGCGCT  | TAAAGGAA  | TAGTCC     | ATTAGGCCAG  |
| Cana.S516    | TTCA  | CCAGTTT | ATTTGGC      | GCCCGTT | CAGAGACTA     | CAAT      | CAGCTGGGCTT  | TAAAGGAA      | TAGTCC    | ACTGGGCCAG |             |
| Cnig.S516-1  | TTGCC | CCAGACA | AA           | TCTGCA  | GCCCGTT       | CAGAGACTA | TAAT         | CGTTTGGGCGCT  | TAAAGGAA  | TAGTCC     | ACTAGGCCAG  |
| Cnig.S516-2  | TTCA  | CTAGCCA | AA           | TCGGCA  | GCCCGTT       | CAGAGACTA | TAAT         | CAGTTGGGCTT   | TAAAGTA   | TAGTCC     | ACTAGGCCAG  |
| Cpe.S516     | TTCA  | CAGCTAT | ATCTGCC      | GCCCGTT | CAGAGACTA     | CAAT      | CAGCTGGGGCTT | TAAAGGAA      | TAGTCC    | ACTGGGCCAG |             |
| Cocu.S516    | TTCCC | CAGGCCA | AA           | TCGGCA  | GCCCGTT       | CAGAGACTA | TAAT         | CATGTGGGGCTT  | TAAAGGAA  | TAGTCC     | ACTGGGCCAG  |
| Crob.S516    | GTCT  | CTAGTCA | AA           | TCGGCA  | GCCCGTT       | CAGAGACTA | TAAT         | CAGTTGGGCGCT  | TAAAGTA   | TAGTCC     | ACTGGGCCAG  |
| Dpau.S516    | CTCT  | CTAGTCA | AA           | TCGGCA  | GCCCGTT       | CAGAGACTA | CAAT         | CGACTGGGGCTT  | TAAAGTA   | TAGTCC     | ACTGGGCCAG  |
| Laca.S516    | ACTC  | CTGGGCA | AA           | TCGGCA  | GCCCGTT       | CAGAGACTA | CAAT         | CGACTGGGGTAT  | TAAAGTA   | TAGTCC     | ACTGGGCCAG  |
| Laen.S516-1  | CCTT  | CTGGTCA | AA           | TCGGCA  | GCCCGTT       | CAGAGACTA | TAAT         | CGACTGGGTCT   | TAAAGTA   | TAGTCC     | ACTGGGCCAG  |
| Laen.S516-2  | CCTT  | CTGGTCA | AA           | TCGGCA  | GCCCGTT       | CAGAGACTA | TAAT         | CGACTGGGGTCT  | TAAAGTA   | TAGTCC     | ACTGGGCCAG  |
| La1b.S516    | CCTT  | CTGGTCA | AA           | TCGGCA  | GCCCGTT       | CAGAGACTA | TAAT         | CGACTGGGGTCT  | TAAAGTA   | TAGTCC     | ACTGGGCCAG  |
| Lco1.S516-1  | TCCT  | CTGGTT  | AA           | TCTGCA  | GCCCGTT       | CAGAGACTA | TAAT         | CGACTGGGCTT   | TAAAGCA   | TAGTCC     | ACTGGGCCAG  |
| Lco1.S516-2  | TCGG  | CAGGCCA | AA           | TCGGCA  | GCCCGTT       | CAGAGACTA | TAAT         | CGAGTGGGGCTT  | TAAAGGAA  | TAGTCC     | ACTGGGCCAG  |
| Lco1.S516-3  | CTCCC | CAGTCA  | AA           | TCGGCA  | GCCCGTT       | CAGAGACTA | TAAT         | CGAGTGGGGCTT  | CCTAAGGAA | TAGTCC     | ACTGGGCCAG  |
| Lco1.S516-4  | TTCCC | AGGCCA  | AA           | TCGGCA  | GCCCGTT       | CAGAGACTA | TAAT         | CGGTTGGGCGCT  | TAAATGGA  | TAGTCC     | ACTGGGCCAG  |
| Lco1.S516-5  | CTCCC | CAGTCA  | AA           | TCGGCA  | GCCCGTT       | CAGAGACTA | TAAT         | CAAGTGGGGTCT  | TAAAGGAA  | TAGTCC     | ACTGGGCCAG  |
| Lco1.S516-6  | TCCT  | CTGGTCA | AA           | TCTGCA  | GCCCGTT       | CAGAGACTA | TAAT         | CAACTGGGGCTT  | TAAAGGAA  | TAGTCC     | ACTGGGCCAG  |
| Lech.S516-1  | CACAT | TCAGAT  | AA           | TCTGCA  | GCCCGTT       | CAGAGACTA | TAAT         | CATCTGGGCGCT  | TAAAGGAA  | TAGTCC     | CAATTGGCCAG |
| Lech.S516-2  | CACAT | CAGACA  | AA           | TCTGCA  | GCCCGTT       | CAGAGACTA | TAAT         | CATCTGGGCGCT  | TAAAGGAA  | TAGTCC     | CAATTGGCCAG |
| Lpse.S516    | TCCC  | CTGGTCA | AA           | TCGGCA  | ACCGGTT       | CAGAGACTA | CAAT         | CGACTGGGGTCT  | TAAAGTA   | TAGTCC     | ACTGGGCCAG  |
| Lpun.S516    | TCCT  | CAGGCCA | AA           | TCGGCA  | GCCCGTT       | CAGAGACTA | TAAT         | CGAGTGGGGTCT  | TAAATGGA  | TAGTCC     | ACTGGGCCAG  |
| Lsp.S516     | CCTT  | CTGGGT  | AA           | TCTGCA  | GCCCGTT       | CAGAGACTA | TAAT         | CAACTGGGGTCT  | TAAAGTA   | TAGTCC     | ACTGGGCCAG  |
| Mobl.S516    | CGGA  | CCAGTCA | AA           | TCGGCA  | GCCCGTT       | CAGAGACTA | TAAT         | CAGTTGGGCGCT  | TAAAGGAA  | TAGTCC     | ATTAGGCCAG  |
| Magg.S516    | GCTG  | CTGGTCA | AA           | TCGGCA  | GCCCGTT       | CAGAGACTA | CAAT         | CGACTGGGCGCT  | TAAAGTA   | TAGTCC     | ACTAGGCCAG  |
| Mcri.S516    | CCTC  | CAAGGCA | AA           | CCTGCA  | GCCCGTT       | CAGAGACTA | CAAT         | CGACTGGGGCTT  | TAAAGCA   | TAGTCC     | CAATTGGCCAG |
| Sfus.S516-1  | ATTCT | CTGGTCA | AA           | TCTGCA  | GCCCGTT       | CAGAGACTA | TAAT         | CAGTTGGGCGCT  | TAAAGGAA  | TAGTCC     | ACTGGGCCAG  |
| Sfus.S516-2  | TTCCC | CTGGTCA | AA           | TCTGCA  | GCCCGTT       | CAGAGACTA | TAAT         | CAGTTGGGCGCT  | TAAAGGAA  | TAGTCC     | ACTGGGCCAG  |
| Lpar.S516    | TCAC  | CTGGAT  | AA           | TTTGCA  | GCCCGTT       | CAGAGACTA | TAAT         | CACGTGGGGTCT  | TAAAGCA   | TAGTCC     | ACTGGGCCAG  |
| Rlyc.S516    | CACAC | CCATTT  | AA           | TCGGCA  | GCCCGTT       | CAGAGACTA | TACAC        | CGAGCGGGGCGCT | TAAAGTA   | TAGTCC     | ACTGGGCCAG  |
| Aglo.S516    | TCCA  | CTGGTCA | AA           | TCTGCA  | GCCCGTT       | CAGAGACTA | TAAT         | CGACTGGGCGCT  | TAAAGGAA  | TAGTCC     | ACTGGGCCAG  |
| Tdec.S516    | GCTC  | CTAGCCA | AA           | TCTGCA  | GCCCGTT       | CAGAGACTA | TAAT         | CGGTTGGGCGCT  | TAAAGGAA  | TAGTCC     | ACTGGGCCAG  |
| Tvar.S516-1  | ACTC  | CTAGTCA | AA           | TCTGCA  | GCCCGTT       | CAGAGACTA | TAAT         | CAGCTGGGCGCT  | TAAAGGAA  | TAGTCC     | ACTGGGCCAG  |
| Tvar.S516-2  | ACTC  | CTAGTCA | AA           | TCTGCA  | GCCCGTT       | CAGAGACTA | TAAT         | CAGCTGGGCGCT  | TAAAGGAA  | TAGTCC     | ACTGGGCCAG  |
| Tvar.S516-3  | ACTC  | CTAGTCA | AA           | TCTGCA  | GCCCGTT       | CAGAGACTA | TAAT         | CAGCTGGGCGCT  | TAAAGGAA  | TAGTCC     | ACTGGGCCAG  |
| Tvar.S516-4  | ACTC  | CTAGTCA | AA           | TCTGCA  | GCCCGTT       | CAGAGACTA | TAAT         | CAGCTGGGCGCT  | TAAAGGAA  | TAGTCC     | ACTGGGCCAG  |
| Tvar.S516-5  | ACTC  | CTAGTCA | AA           | TCTGCA  | GCCCGTT       | CAGAGACTA | TAAT         | CAGCTGGGCGCT  | TAAAGGAA  | TAGTCC     | ACTGGGCCAG  |
| Tvar.S516-6  | ACTC  | CTAGTCA | AA           | TCTGCA  | GCCCGTT       | CAGAGACTA | TAAT         | CAGCTGGGCGCT  | TAAAGGAA  | TAGTCC     | ACTGGGCCAG  |
| Tvar.S516-7  | ACTC  | CTAGTCA | AA           | TCTGCA  | GCCCGTT       | CAGAGACTA | TAAT         | CAGCTGGGCGCT  | TAAAGGAA  | TAGTCC     | ACTGGGCCAG  |
| Tvar.S516-8  | ACTC  | CTAGTCA | AA           | TCTGCA  | GCCCGTT       | CAGAGACTA | TAAT         | CAGCTGGGCGCT  | TAAAGGAA  | TAGTCC     | ACTGGGCCAG  |
| Tvar.S516-9  | ACTC  | CTAGTCA | AA           | TCTGCA  | GCCCGTT       | CAGAGACTA | TAAT         | CAGCTGGGCGCT  | TAAAGGAA  | TAGTCC     | ACTGGGCCAG  |
| Tvar.S516-10 | ACTC  | CTAGTCA | AA           | TCTGCA  | GCCCGTT       | CAGAGACTA | TAAT         | CAGCTGGGCGCT  | TAAAGGAA  | TAGTCC     | ACTGGGCCAG  |
| Tvar.S516-11 | ACTC  | CTAGTCA | AA           | TCTGCA  | GCCCGTT       | CAGAGACTA | TAAT         | CAGCTGGGCGCT  | TAAAGGAA  | TAGTCC     | ACTGGGCCAG  |
| Tvar.S516-12 | TTTCT | CTGGTCA | AA           | TCTGCA  | GCCCGTT       | CAGAGACTA | TAAT         | CGGTTGGGCGCT  | TAAAGGAA  | TAGTCC     | ACTGGGCCAG  |
| Tvar.S516-13 | ACTC  | CTAGTCA | AA           | TCTGCA  | GCCCGTT       | CAGAGACTA | TAAT         | CAGCTGGGCGCT  | TAAAGGAA  | TAGTCC     | ACTGGGCCAG  |
| Tvar.S516-14 | ACTC  | CTAGTCA | AA           | TCTGCA  | GCCCGTT       | CAGAGACTA | TAAT         | CAGCTGGGCGCT  | TAAAGGAA  | TAGTCC     | ACTGGGCCAG  |
| Tvar.S516-15 | ACTC  | CTAGTCA | AA           | TCTGCA  | GCCCGTT       | CAGAGACTA | TAAT         | CAGCTGGGCGCT  | TAAAGGAA  | TAGTCC     | ACTGGGCCAG  |
| Tvar.S516-16 | ACTC  | CTAGTCA | AA           | TCTGCA  | GCCCGTT       | CAGAGACTA | TAAT         | CAGCTGGGCGCT  | TAAAGGAA  | TAGTCC     | ACTGGGCCAG  |
| Tvar.S516-17 | ACTC  | CTAGTCA | AA           | TCTGCA  | GCCCGTT       | CAGAGACTA | TAAT         | CAGCTGGGCGCT  | TAAAGGAA  | TAGTCC     | ACTGGGCCAG  |
| Tvar.S516-18 | TTTCT | CTGGTCA | AA           | TCTGCA  | GCCCGTT       | CAGAGACTA | TAAT         | CGGTTGGGCGCT  | TAAAGGAA  | TAGTCC     | ACTGGGCCAG  |
| Tvar.S516-19 | ACTC  | CTAGTCA | AA           | TCTGCA  | GCCCGTT       | CAGAGACTA | TAAT         | CAGCTGGGCGCT  | TAAAGGAA  | TAGTCC     | ACTGGGCCAG  |
| Tvar.S516-20 | ACTC  | CTAGTCA | AA           | TCTGCA  | GCCCGTT       | CAGAGACTA | TAAT         | CAGCTGGGCGCT  | TAAAGGAA  | TAGTCC     | ACTGGGCCAG  |
| Tvar.S516-21 | ACTC  | CTAGTCA | AA           | TCTGCA  | GCCCGTT       | CAGAGACTA | TAAT         | CAGCTGGGCGCT  | TAAAGGAA  | TAGTCC     | ACTGGGCCAG  |
| Tvar.S516-22 | ACTC  | CTAGTCA | AA           | TCTGCA  | GCCCGTT       | CAGAGACTA | TAAT         | CAGCTGGGCGCT  | TAAAGGAA  | TAGTCC     | ACTGGGCCAG  |
| Tvar.S516-23 | ACTC  | CTAGTCA | AA           | TCTGCA  | GCCCGTT       | CAGAGACTA | TAAT         | CAGCTGGGCGCT  | TAAAGGAA  | TAGTCC     | ACTGGGCCAG  |
| Tvar.S516-24 | TTTCT | CTGGTCA | AA           | TCTGCA  | GCCCGTT       | CAGAGACTA | TAAT         | CGGTTGGGCGCT  | TAAAGGAA  | TAGTCC     | ACTGGGCCAG  |
| Tvar.S516-25 | TTTCT | CTGGTCA | AA           | TCTGCA  | GCCCGTT       | CAGAGACTA | TAAT         | CGGTTGGGCGCT  | TAAAGGAA  | TAGTCC     | ACTGGGCCAG  |
| Dniv.S516    | GGCA  | CTAGCCA | AA           | TCTGCA  | GCCCGTT       | CAGAGACTA | TAAT         | CGACTGGGCGCT  | TAAAGAA   | TAGTCC     | ACTGGGCCAG  |
| Ecoe.S516    | CTTC  | CTGGTCA | AA           | TCGGCA  | GCCCGTT       | CAGAGACTA | TAAT         | CAATTGGGCGCT  | TAAAGTA   | TAGTCC     | ACTGGGCCAG  |

## Molecular phylogeny of myxomycete taxa based on SSU rDNA sequences

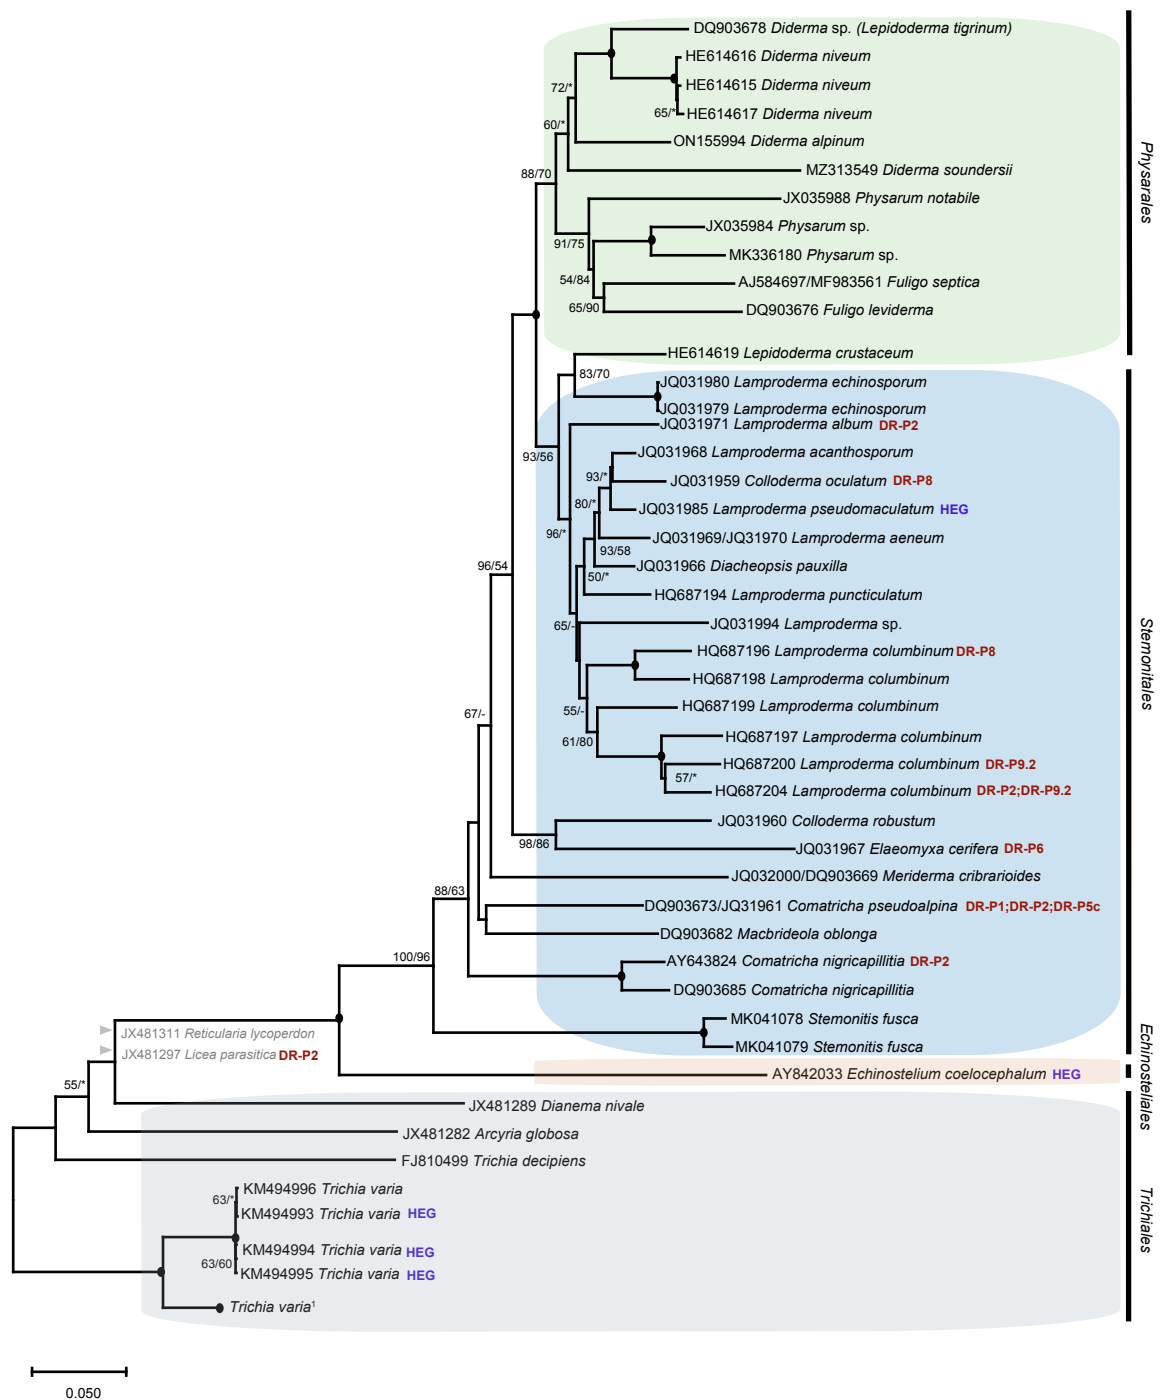

Figure S2

## Molecular phylogeny of myxomycete S516 group I introns

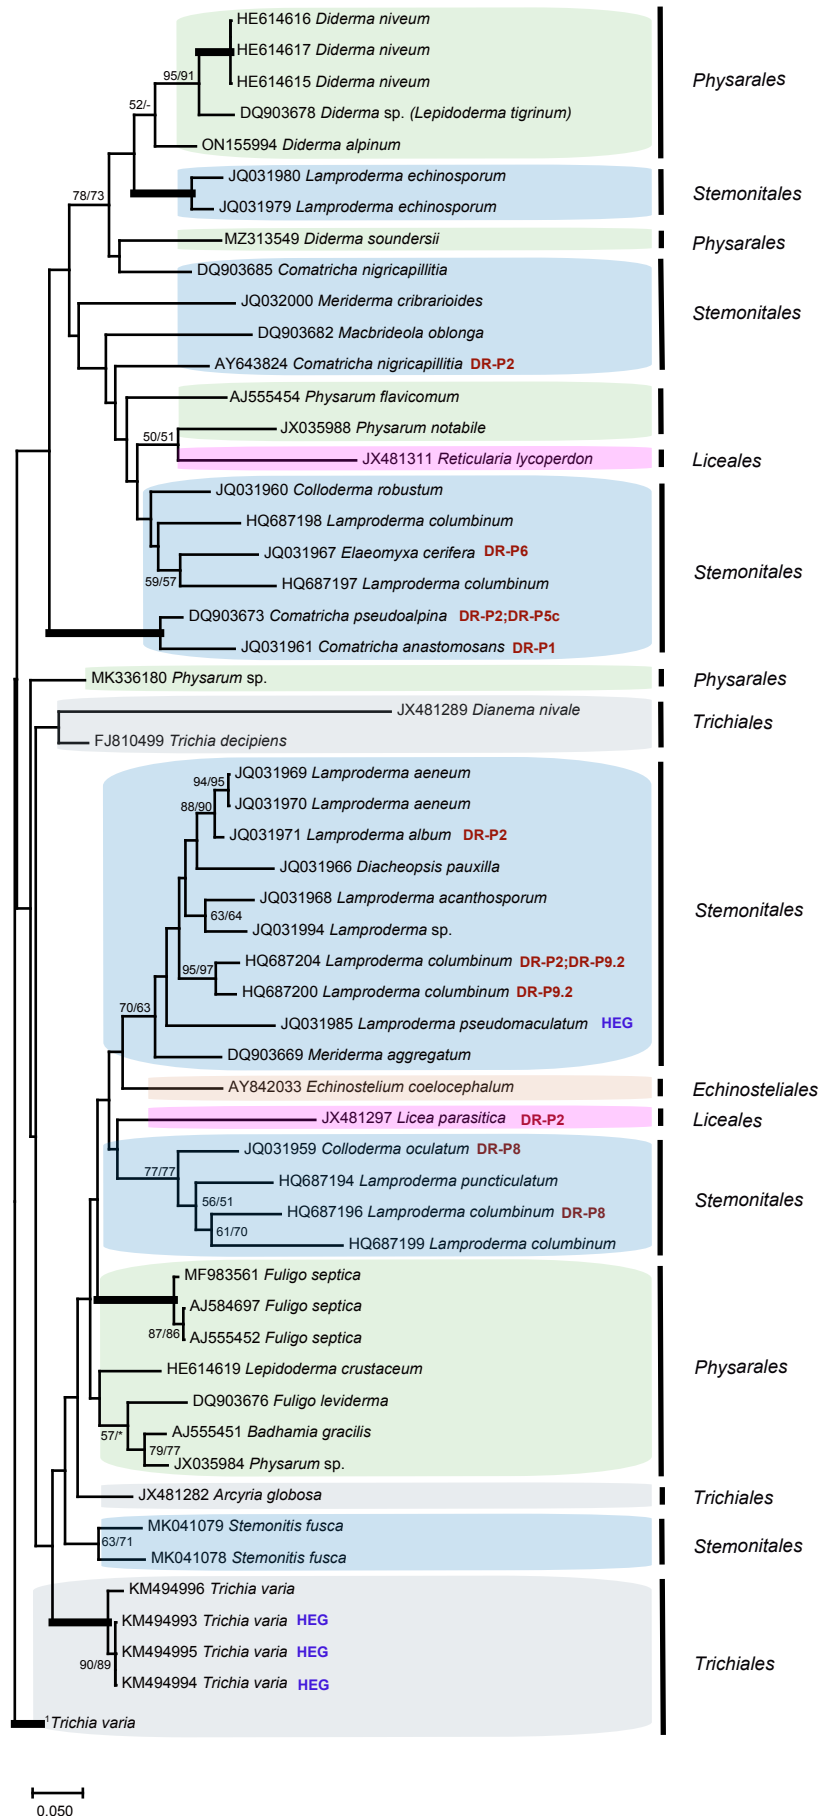

Figure S3

A

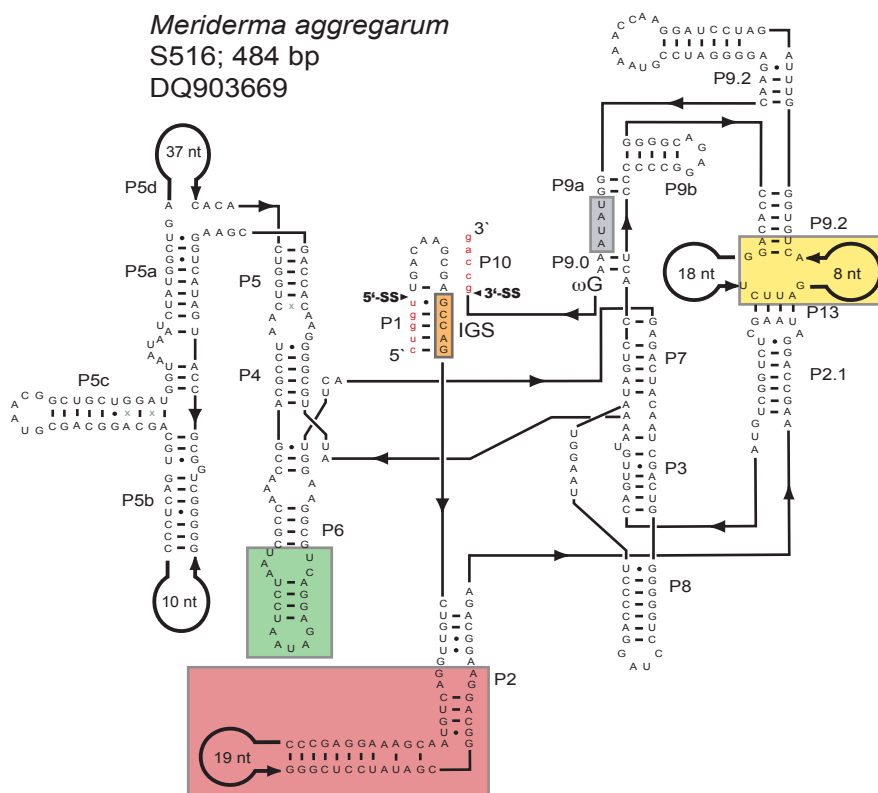

B

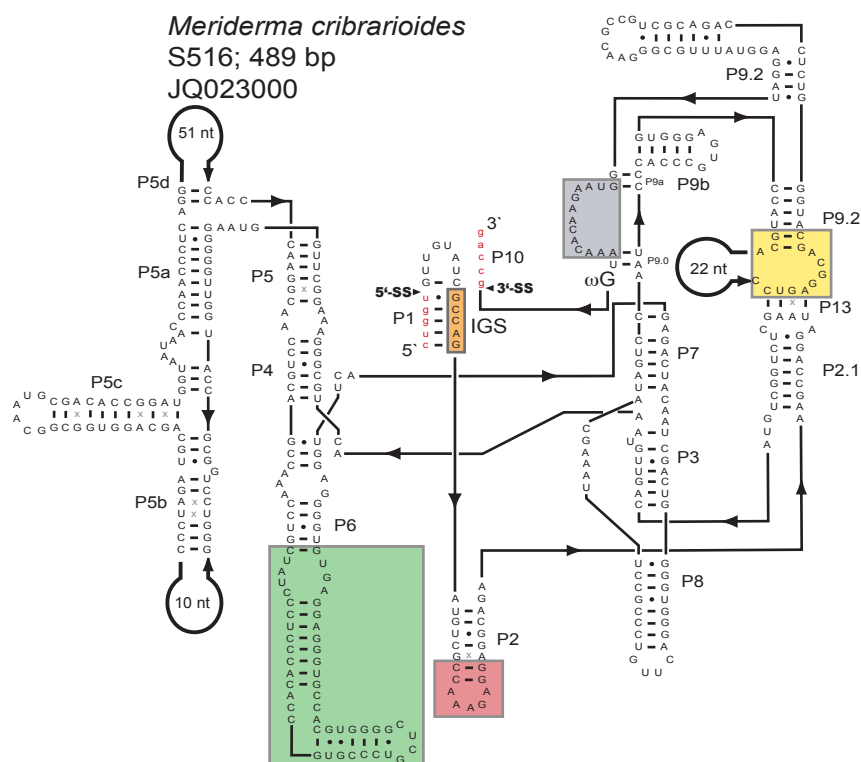

Figure S4



A

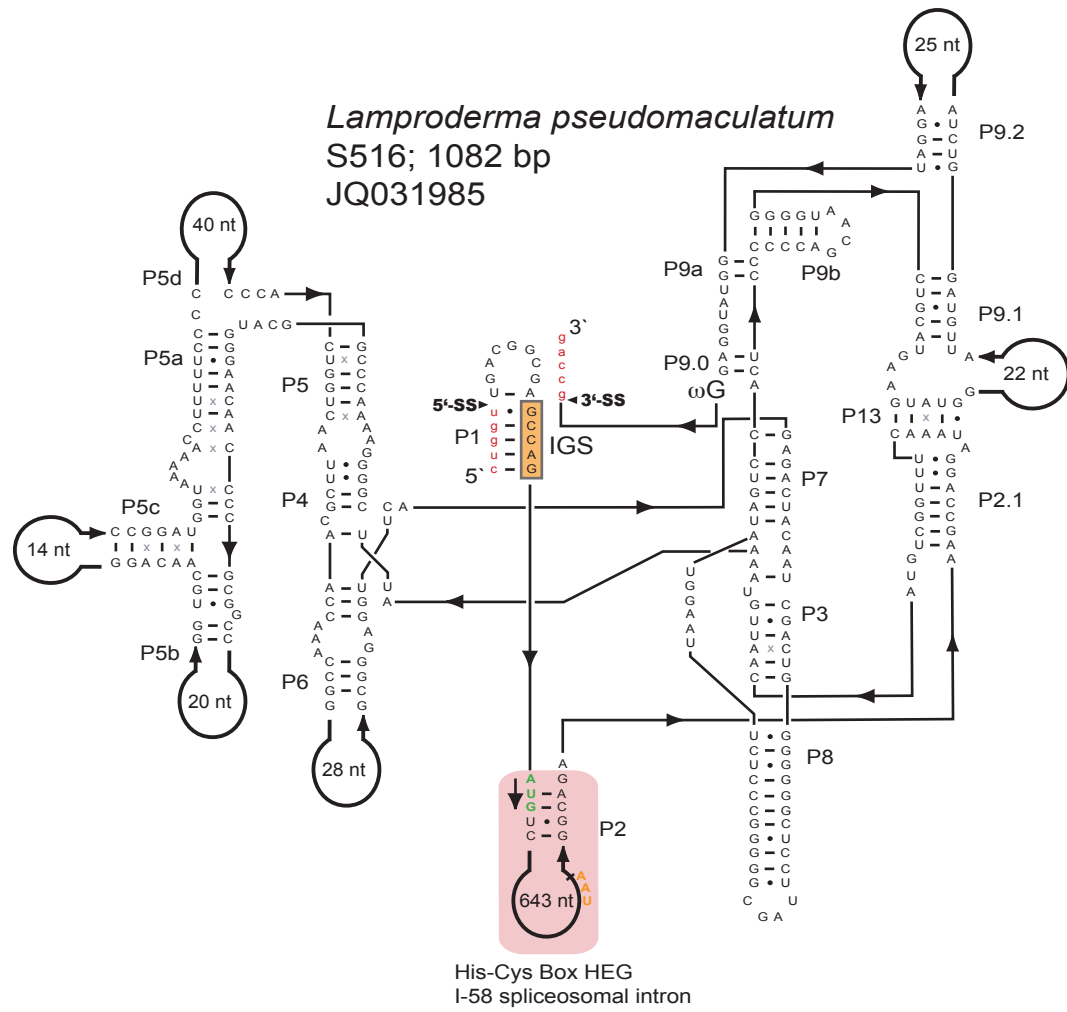

B

ATGTCGAACAATGAGGGAACAACCGAACGTCGAAAGCACAACAAGTCTGGGCTGACCACGCTGAGCGTACTGAAG  
TCGAGTGATGAAATGATCCTGGCGCTAGAGCCTCTCCTAAAAAGGAAGGCACGGGCAATAGGCTTCGAAGTAGTC  
AAGCGATCCAGGTGCAAAGTATGGCCGAACAAAAAGTCCAAGATCACCAAGGGCAAGGTATGGCGGGCTGAGCTG  
AACCGAAAGATCGGGCATGAACTAACCACTCGCTGCCCCAGGACGTCGGGGAGGCCATATCATGTTAGGGCATTTCA  
AGTATTCGGCCGGGAACGTTTGGGGCTGGTACCCCCGAACAAGCGCCAAGGCGACCTCGTGGTATCGCATATATG  
CGGACCCGTCACCTGCCTGAAGCGTACCCACCTGCTGCTGGAGCCAAAGTGGGTGAATGACGAACGAACCCACTG  
CCACTTTCTGCCACATTCATGGCGGCGAGGGGCAAGGATCCGGCGGAGACTGTGAAGGCTGTTAGAAAGGCGTG  
CCCTCATGAGCCTAGGTGCTTCTCGTACCTGGGCAATTTCGAACCTGATGAACGTGTAATTGTGAGGCCTGTGCC  
AGTGGTAATAAACACCATGTAA

C

MSMSNNEGTTERRKHNSGLTTLVLKSSDEMILALEPLLRKARAIGFEVVKRSRCKVWPNNKSKITKGKDVGE  
AYHVRAFQVFGRRERLGLVPPNKRQGDVVSICGTRHCLKRTHLLLEPKWVNDERTHCHFLPHSMAARGKDP AET  
VKAVRKACPHPRCFSYLGNFEPDERVIVRPVPPVINTM 187

Figure S5

A

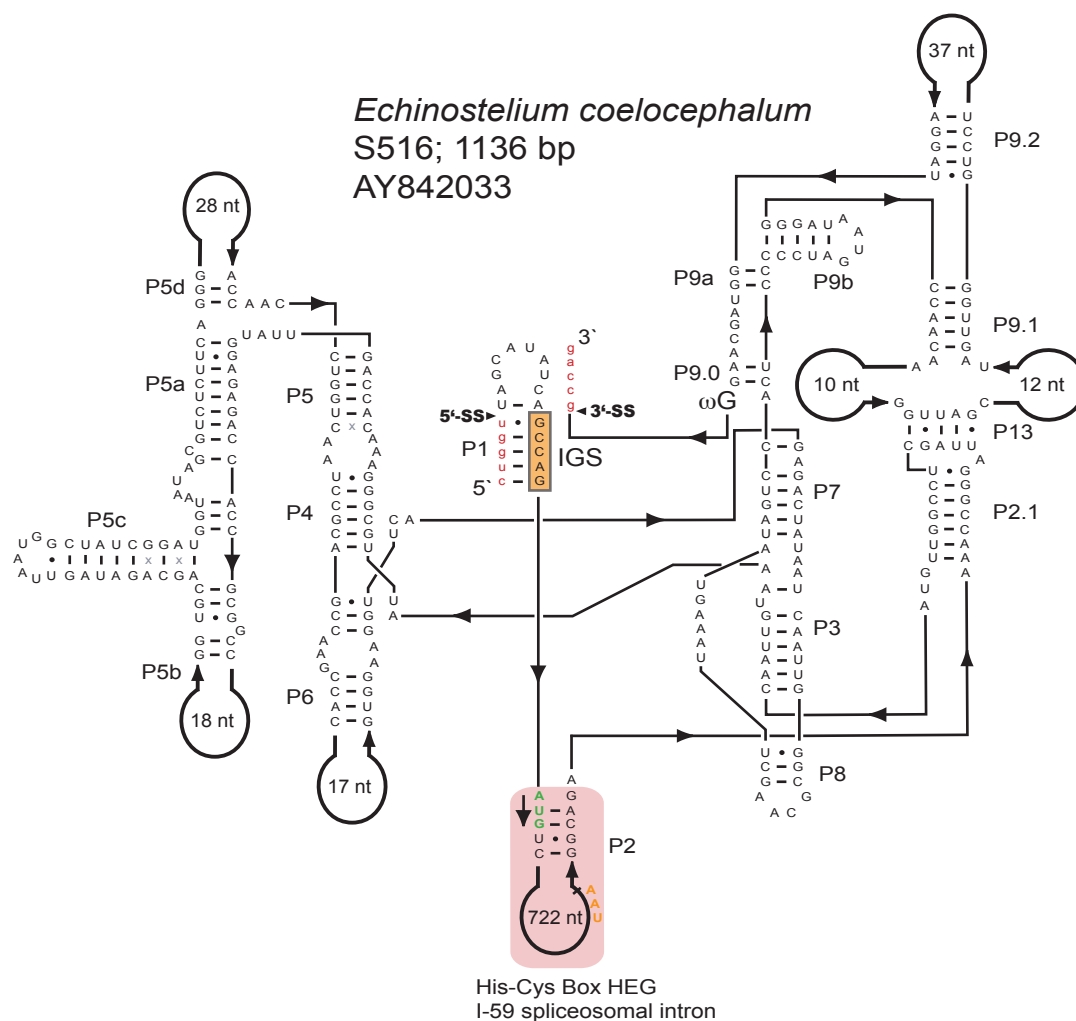

B

ATGCTCTGATAGGCTACACAACAAATCGGGTTTAACTGGCTTATCTTTTTTGCAGGAAGATGATACTGTCCTTGCG  
GAGTGGACGAAGACTTTGAATAGGCGGGTGAAGGACGGCAAAGAGGCGCGAAGTGCCCCAAAGGTGATTCCACAC  
TCTCGCTGTCGGCTACTTGCCAACCACAAAGGCACCTTTGGTCATGAGCTCAAAGGTATGATCATTGTTGGGATTGG  
GATTAGGGTTAACTGTATACTGATGGATTACATACAGCATGTCTGCTACGGCTACCAACTACGTGCTTTGGAGG  
TGTTCCGAAGGGATAGGATGGCCCAGGTTCCCTCCCAACAAGGCTGGAGACTCCCTTTTGATATCGCATGTCTGTG  
GTACTCGGAAGTCTGCCGACGCACGCACCTTGTGATTGAGCCGAAGCACATCAATGATGAGCGGGTGCCTGCTGCC  
ACATGGTCCGCGCACTGGATGTGGAAGAAGTCAAAGCGCTACGGCAAACGGATGGCAAAGGTTAGGGCGGCAGTCC  
AGCTTGCTTGCCCTCACGAGCCAAAGTGTCTTACAAGTGTACGGGATCTGGATGTTAAAGACCGCTTTGTAGAGT  
CCAAGCCGAGTAATGCAATAAAATATGATTAA

C

MSDRLHNKSGLTGLSFLQEDDTVLAEWTKTLNRRVKDGKEARSAPKVIIPHSRCLLLANHKGTLVMSSKHVCYGYQ  
LRALEVFGRDRMAQVPPNKGDSLILISVCGTRNCCRTHLVIEPKHINDERVHCHMVAHWMWKKSKRYGKRMK  
VRAAVQLACPHEPKCLTSVRDLVDKDRFVESKPSNAIKYD 190

Figure S6

A

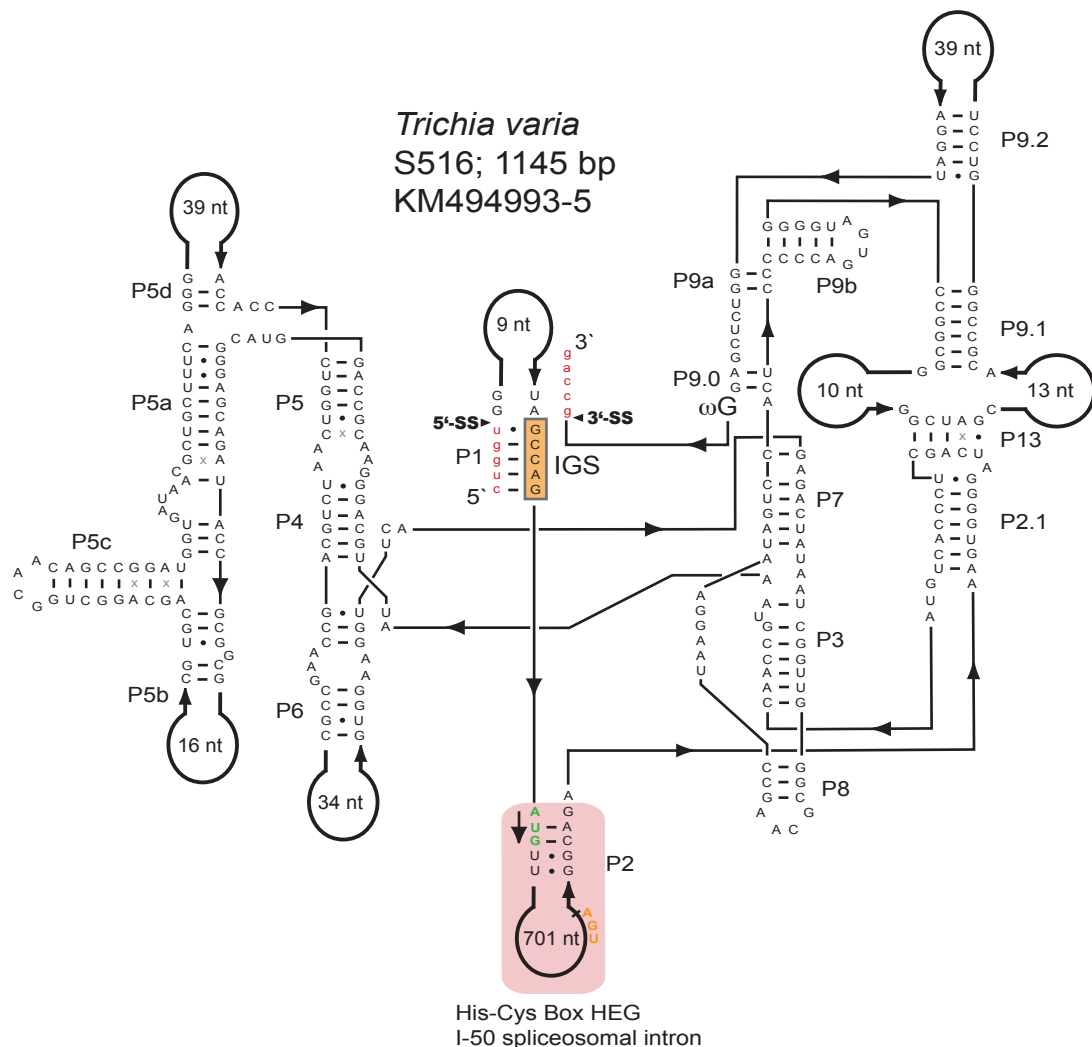

B

ATGTTTCACACGAGAAAGGCCCAACAAGTCCAACAAAAGCCACCTATCGTTCCTAGACGAGCCGGAGGCACAC  
CTTATAGAATATATAAGGGAGCTGAAGGTGTGTGGCCGAGTAATTGGGAGTGTAGTGGGGCGGTGGCTTTGCGAG  
GTGCGTGGTACTAACAACCCCGTCCAGGCTCGCCTTGTGGATGGACATATCATGCGGGCCTTTGCCAAGGCTCGC  
CCTGTGAGATGCTGCGGTCCCTGAAAGGCAGGCTGATGACTACTCGGTTCGCGGGACCACAAGCCAAGCGTGGACA  
TCGCTTATGGGTATCAGTTGATAGCCCTGGAGAAGTTTGGGATCGGAATTATGCGGGAGGTTGCGCCGCTAAGG  
ACAGGGACTCGATTACAATATCACATTTGTGCGGGACCCTGCTCTGCTGCAGTGGGATCACCTGGTGTGGAAAC  
CCAAATGGCTGAACGACGAGCGGACTTGCTGCCACTTCGTACTGCTTAGTGCTTTTAAAGCACGGCGGGTTAGAGG  
CAGTGACCGCCGTTTCTGGAGGCCGGCGGGTGCCCGCATACACCTCAGTGTGGCTCCATTGCTGTTAATAAGATAG  
TACGCTTCCCACCACATGCTCTGTACCCCGATATAGCCCTACCTCCCCGACGGAGGAGGAGAAATAAAAAATATC  
AATAC**TGA**

C

MMFHTRKAHNKSNKSHLSFLDEPEAHLIEYIRELKVCGRVIGSARLVDGTYHAGLCQGSPCEMLRSLKGRMLMTTR  
LRDHKPSVDIAYGYQLIALEKFGIGIMREVAPSKDRDSITIS**HL**CGTLL**CC**SAD**HL**VLEPKWL**ND**ERTC**CH**FVLL  
SAFKHGGLAETAVLEAGG**CP**HT**PQ**CGSIAVNKIVRFPPHALYPDIALPPPTTEENKKYQY 210

Figure S7



## Supplementary Figure S8

Direct repeat features in S516 intron segments

### P1:

*Comatricha anastomosans* - JQ031961

```
1: AGGGGCAGATGGGAAGCGAGCGGGG----ATTTCATGGTCCCC--GCTTGAAAGCGGCAAGGAAGC-GGGGAGGAA
2: AGGGGTGGACGGGAAGCGAGCGGGG----ATTTCATGGTCCCC--GCTTGAAAGCGGCAAGGAAGCAGGGGAGGAA
3: --GGGTGGACGGGAAGCGAGCGGGGGGGGATCTCACGGTCCCCCCCCGCTTGAAAGCGGCAAGGAAACAGGGGGGGAA
4: AGGGGTGGACAAAAAGCGAGCGGGG---ATCTCATGTTCTCCC---GCTTGAAAGCGGCAAGGAAGCAGGGGGGGAA
```

```
1: TCTCCCC-GC-TTCCCCACTGCGTTCCAGATGCCCTG
2: TCTCCCCTGCCTTCCCCACTGCGTTCCAGATGCCCTG
3: TCTTCCCTGCCTTCC-TACTGCGTTCCAGATGCCCTG
4: TCTCCCCTGCCTTCCCCACTGCGTTCTCGGACACCCCTG
```

Copy no: 4  
Motif size: 107 nt – 114 nt

*Comatricha pseudoalpina* - DQ903673

```
1: AGGGGGCGGATGGGAAGCGGGCGGGG--ATTTCATGATCCCC--GCTTGAAAGCGGCAAGGAAGCGTGGGG--TCA
2: AGGGG--CGGACGGGAAGCGGGCGGGGGGATCTCATGTTCTCCCGCTTGAAAGCGGCAAGGAAGCGACGGG-GCCA
3: GGGGG--TGGACGGGAAGCGGGCGGGG--ATTTCATGTTCCCCCGCTCGAAAGCGGCAAGGAAGCGAGGGG-CCCA
4: AGGGG--TGGACGAGAAGCGGGCGGGG--ATTTCATGTCCCC--GCTTGAAAGCGGCAAGGAAGCGGGGGGGTAA
```

```
1: TTCCCC-----GCTTCCCCACTGCGTTCCAGATGTCCAG
2: TTCCCC-----TAGCTTCCCCACTGCGTTCCAGATG-CCTCT
3: TTACCCC-----TGCTTCCCCACTGCGTTCCCGATACCCCTG
4: TCTCCCCCCTGCCTTCCCCACTGCCTTCTCGGACGCCCTG
```

Copy no: 4  
Motif size: 109 nt – 114 nt

### P2:

*Comatricha nigricapillitia* - AY643824

```
1: ACAA
2: ACAA
3: ACAA
4: ACAA
```

Copy no: 4  
Motif size: 4 nt

### *Lamproderma album* - JQ031971

1: ACCGATCTCACGCCAACGAACCAAGCATCCTCGGGGAGATGATGGTTGCCACACGGAACGACGCACCCTGGTCA  
2: ACCGATCTCGCGCCAACGAACCAAGCATCCTCGGGGAGATGATGGTCGCCACATGGAACGACGCACCCTGGTCA  
  
1: GGTGCCGAGTTCCGGGCTCGATGC-----GATCTCTG-CCCTCGGGGTGGCAGGGAACGCGCTTGTGGATCGACA  
2: GGTGCCGAGTTCCAGGCTCGATGCACAGCGATCTCTGGCCCTCGGGGTGGCAGGGAACCCGCTCGTGGGTCGACG  
  
1: GAAGGCGTGGGGGAGTCATGAAGCGGAACGAGCCCTCGGGGCGGCTCTGGAGGCGGACGGGCAAGGTGT-GCAGG  
2: GAAGGCGTGGGGAGAACCATAAGCGGAACGAGCCCTCGGGGTGGCTCTGGAAGCGGACGGGCGAGGTGTTGCAGG

Copy no: 2  
Motif size: 219 and 226 nt

### *Lamproderma columbinum* - HQ687204

Motif I:  
1: GACCAATCGTGATTCTTGTT  
2: GACCAATCGTGATTCTTGTT  
3: GACCAATCGTGATTCTTGTT  
4: GACCA-TCGTGATTCTTGTT  
5: GACCAATCGTGATTCTTGTT

Copy no: 5  
Motif size: 19 and 20 nt

Motif II:  
1: GACTAAAAGGGAGGGGTAAAT  
2: GACTAAA-GGAAGGG--TAAAT  
3: GACTAAA-GGGAGGGGTAA-T

Copy no: 3  
Motif size: 19 - 22 nt

### *Licea parasitica* - JX481297

|                             |     |
|-----------------------------|-----|
| 1: GGAGGGATACCTTTTCCGCGGCA  | I   |
| 2: GGAGGGATACCTTTTCCGCGGCA  | I   |
| 3: GGAGGGATACCTTTTCCGCGGCA  | I   |
| 4: GGAGGGATACCTTTTCCGCGGCA  | I   |
| 5: GGAGAGGCACCTTTTCCGCGGCA  | II  |
| 6: GGAGGGACACCTTTTCCGCGGCA  | III |
| 7: GGAGGGACACCTCTTCCGCGGCA  | IV  |
| 8: GGAGAGGCACCTTTTCCGCGGCA  | II  |
| 9: GGAGAGGCACCTTTTCCGCGGCA  | II  |
| 10: GGAGGGATACCTTTTCCGCGGCA | I   |
| 11: GGAGGGGACCTCTTCCGCGGCA  | V   |
| 12: GGAGAGGCACCTCTTCCGCGGCA | VI  |
| 13: GGAGAGGCACCTTTTCCGCGGCA | II  |
| 14: GGAGAGGCACCTTTTCCGCGGCA | II  |
| 15: GGAGGGATACCTTTTCCGCGGCA | I   |
| 16: GGAGGGACACCTCTTCCGCGGCA | IV  |
| 17: GGAGGGACACCTCTTCCGCGGCA | IV  |
| 18: GGAGGGACACCTCTTCCGCGGCA | IV  |
| 19: GGAGGGACACCTCTTCCGCGGCA | IV  |
| 20: GGAGGGACACCTCTTCCGCGGCA | IV  |
| 21: GGAGGGACACCTCTTCCGCGGCA | IV  |
| 22: GGAGGGACACCTCTTCCGCGGCA | IV  |
| 23: GGAGGGACACCTCTTCCGCGGCA | IV  |
| 24: GGAGGGACACCTCTTCCGCGGCA | IV  |
| 25: GGAGAGGTACCTCTTCCGCGGCT | VII |

Copy no: 25  
Motif size: 23 nt

*Trichia varia* – KM494996

1: AAAGGCCCGCCTTT  
2: AAAGGCCCGCCTAT

Copy no: 2  
Motif size: 14 nt

**P5:**

*Comatricha pseudoalpina* - DQ903673

1: GGGTGAGATCGATAAAGGTTTGGGCTATTAACGCCTGCGTGCCTGCTTCTTTCAA-GCCA  
2: GGGCGAGATCGATAAAGGTTTGGGCTATTAACGCCTGCGTACCTGCTTCTTTCAAAGCCA

Copy no: 2  
Motif size: 59 and 60 nt

**P6:**

*Elaeomyxa cerifera* - JQ031967

Motif I:  
1: TAGGGTTACGC  
2: TAGAGTTACGT  
3: TAGGGTTACGC  
4: CAGGTTTACGC

Copy no: 4  
Motif size: 11 nt

Motif II:  
1: TAACCCTAGA  
2: TAACCCTAGA  
3: TAACCCTAGG  
4: AAACCTTAGC  
5: TGACCCTAGG  
6: TAACCCTAGG

Copy no: 6  
Motif size: 10 nt

Motif III:  
1: CAACCCTATGCAAAATCTTATGTTTCGGTGCCTCTAGGCCCCCGCGGTGAAAACCATGGTGGTTTGGTAAAAATCGAAGC  
2: CAACC-TATGCAAAACCTTATGTTTCGGTGCCTCTGGGCCACAGTGGTGAAAACCTATAGTGGTTTGGTAAAAATCGAAGC

Copy no: 2  
Motif size: 79 and 80 nt

**P8:**

*Colloderma oculatum* - JQ031959

1: CCCCCCGCGTCGACCCTTGGCCCCCCTCGTCATGAGGGGGGGGTCTCGGCGAGGGTAGGGGTCTGCCCCGTCG  
2: TCCTGCCCCGTCGACCCTTGGCCTGCCCTCGTCATGAGGGGGGGGTCTCGGCGAGGGT----GTCTGCCCTGTCG

1: ACCCTTGGCCCGCCCTCGTCATGAGGGGGTGTCTCGGCGAGGG-TGGGG  
2: ACCCTTGGCCTGCCCTCGTCGTGAGGGGGGGTCTCGGCGAGGGGTGGGG

Copy no: 2  
Motif size: 120 and 123 nt

### *Lamproderma columbinum* HQ687196

Motif I:  
1: CTTT-AAAGGAACTG  
2: CTTT-AAGGGA-CTC  
3: CTTT-AAGGGA-CTG  
4: CTTT-AAGGGA--TC  
5: CTTTGAAGAGT-CAG

Copy no: 5  
Motif size: 11 - 14 nt

Motif II:  
GGCTTTAGTC  
GGTTTTAGTC

Copy no: 2  
Motif size: 10 nt

## **P9:**

### *Lamproderma columbinum* - HQ687204

1: AAAGCAGTCAAACCAGTTAAAAGCAGTC  
2: AATCCAGTCAAACCAGTTAAAAGCAGGC

Copy no: 2  
Motif size: 28 nt

### *Lamproderma columbinum* - HQ687200

1: AAACCAAGTT  
2: AAACCAAGTC  
3: AAACCTACGC

Copy no: 3  
Motif size: 9 nt

***Trichia varia* S516 Group I intron with and without HEG**

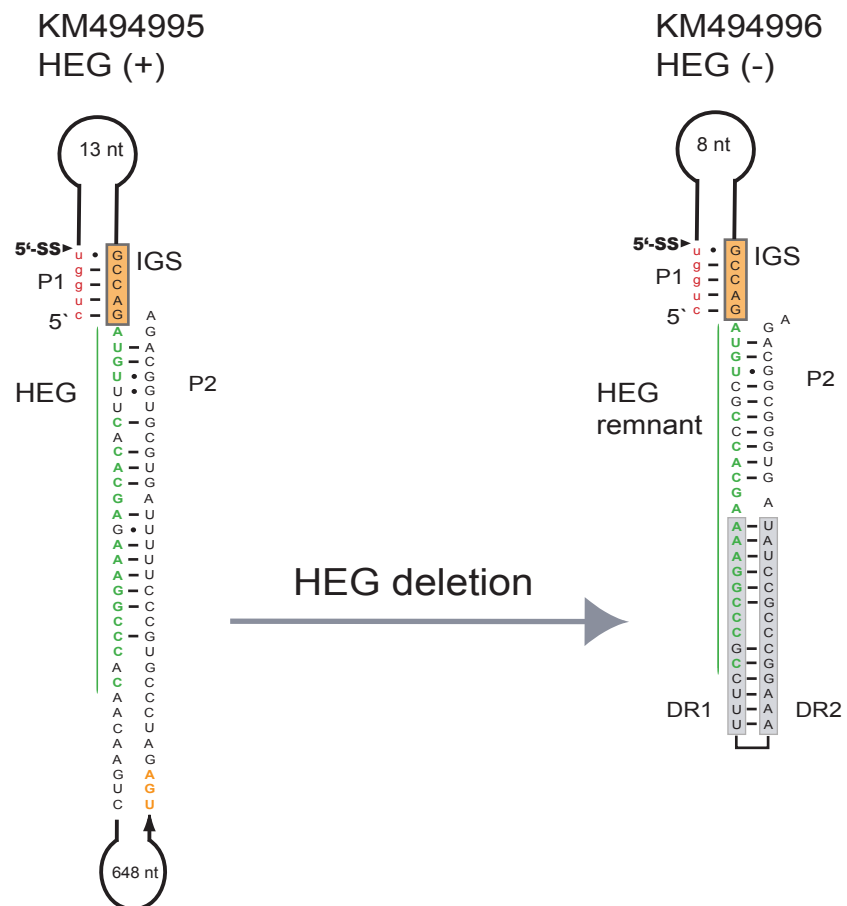

Figure S9

**Table S1**

Key features of 75 nucleolar group I introns at position S516 in myxomycetes.

| Host species                                      | Strain/ isolate | S516    | Acc. Number | Insert         |
|---------------------------------------------------|-----------------|---------|-------------|----------------|
| <b>Myxomycetes</b>                                |                 |         |             |                |
| <b>Order: Physarales; Family: Didymiceae</b>      |                 |         |             |                |
| <i>Diderma alpinum</i>                            | Fr-K12          | 534 bp  | ON155994    | -              |
| <i>Diderma niveum</i>                             | Fr-K10          | 496 bp  | HE614615    | -              |
| <i>Diderma niveum</i>                             | It-K66          | 496 bp  | HE614616    | -              |
| <i>Diderma niveum</i>                             | Uk-K79          | 496 bp  | HE614617    | -              |
| <i>Diderma soundersii</i>                         | Mx-K30          | 482 bp  | MZ313549    | -              |
| <i>Lepidoderma crustaceum</i>                     | It-K62          | 474 bp  | HE614619    | -              |
| <i>Lepidoderma tigrinum</i>                       | AMFD192         | 501 bp  | DQ903678    | -              |
| <b>Order: Physarales; Family: Physarceae</b>      |                 |         |             |                |
| <i>Badhamia gracilis</i>                          | Az4-1           | 428 bp  | AJ555451    | -              |
| <i>Fuligo leviderma</i>                           | AMFD130         | 402 bp  | DQ903676    | -              |
| <i>Fuligo septica</i>                             | NY-1            | 534 bp  | AJ584697    | -              |
| <i>Fuligo septica</i>                             | HMJAU1009       | 538 bp  | MF983561    | -              |
| <i>Fuligo septica</i>                             | unknown         | 534bp   | AJ555452    | -              |
| <i>Physarum flavicomum</i>                        | UFF6            | >493 bp | AJ555453/4  | -              |
| <i>Physarum notabile</i>                          | LE47491         | 574 bp  | JX035988    | -              |
| <i>Physarum</i> sp.                               | LE255721        | 441 bp  | JX035984    | -              |
| <i>Physarum</i> sp.                               | AMFD-2018a      | 445 bp  | MK336180    | -              |
| <b>Order: Stemonitales; Family: Stemonitaceae</b> |                 |         |             |                |
| <i>Comatricha anastomosans</i>                    | Now12905        | 1411 bp | JQ031961    | DR-P1          |
| <i>Comatricha nigricapillitia</i>                 | MM21077         | 489 bp  | DQ903685    | -              |
| <i>Comatricha nigricapillitia</i>                 | Isolate 3       | 564 bp  | AY643824    | DR-P2          |
| <i>Comatricha pseudoalpina</i>                    | MM23892         | 1471 bp | DQ903673    | DR-P1; DR-P5c  |
| <i>Colloderma oculatum</i>                        | HS2885          | 719 bp  | JQ031959    | DR-P8          |
| <i>Colloderma robustum</i>                        | AMFD270         | 510 bp  | JQ031960    | -              |
| <i>Diacheopsis pauxilla</i>                       | MM29883         | 516 bp  | JQ031966    | -              |
| <i>Elaeomyxa cerifera</i>                         | MM24498         | 725 bp  | JQ031967    | DR-P6          |
| <i>Lamproderma acanthosporum</i>                  | MM36058         | 536 bp  | JQ031968    | -              |
| <i>Lamproderma aeneum</i>                         | MM36255         | 497 bp  | JQ031969    | -              |
| <i>Lamproderma aeneum</i>                         | AK06013         | >490 bp | JQ031970    | -              |
| <i>Lamproderma album</i>                          | MM37151         | 993 bp  | JQ031971    | DR-P2          |
| <i>Lamproderma columbinum</i>                     | Isolate F2      | 821 bp  | HQ687204    | DR-P2; DR-P9.2 |
| <i>Lamproderma columbinum</i>                     | Isolate 106     | 885 bp  | HQ687196    | DR-P8          |
| <i>Lamproderma columbinum</i>                     | Isolate 90      | 699 bp  | HQ687198    | -              |
| <i>Lamproderma columbinum</i>                     | Isolate 94      | 650 bp  | HQ687199    | -              |
| <i>Lamproderma columbinum</i>                     | Isolate 63b     | 594 bp  | HQ687197    | -              |
| <i>Lamproderma columbinum</i>                     | Isolate 132     | 650 bp  | HQ687200    | DR-P9.2        |
| <i>Lamproderma echinosporum</i>                   | AMFD136         | 510 bp  | JQ031980    | -              |
| <i>Lamproderma echinosporum</i>                   | AK06016         | 509 bp  | JQ031979    | -              |
| <i>Lamproderma pseudomaculatum</i>                | MM37354         | 1082 bp | JQ031985    | HEG-P2; I-58   |
| <i>Lamproderma puncticulatum</i>                  | Isolate 172     | 623 bp  | HQ687194    | -              |
| <i>Lamproderma</i> sp.                            | AMFD-2011a      | 449 bp  | JQ031994    | -              |
| <i>Macbrideola oblonga</i>                        | unknown         | 462 bp  | DQ903682    | -              |
| <i>Meriderma aggregarum</i>                       | AMFD135         | 484 bp  | DQ903669    | -              |
| <i>Meriderma cribrarioides</i>                    | MM37106         | 489 bp  | JQ032000    | -              |
| <i>Stemonitis fusca</i>                           | MM39482         | 460 bp  | MK041079    | -              |
| <i>Stemonitis fusca</i>                           | AMFD519         | 482 bp  | MK041078    | -              |
| <b>Order: Liceales; Family: Liceaceae</b>         |                 |         |             |                |
| <i>Licea parasitica</i>                           | AMFD341         | 1149 bp | JX481297    | DR-P2          |
| <b>Order: Liceales; Family: Reticulariaceae</b>   |                 |         |             |                |
| <i>Reticularia lycoperdon</i>                     | AMFD262         | 494 bp  | JX481311    | -              |



**Order: Trichiales; Family: Trichiaceae**

|                          |               |         |          |              |
|--------------------------|---------------|---------|----------|--------------|
| <i>Arcyria globosa</i>   | AMFD252       | 459 bp  | JX481282 | -            |
| <i>Trichia decipiens</i> | unknown       | 457 bp  | FJ810499 | -            |
| <i>Trichia varia</i>     | LE254838      | 443 bp  | KM495030 | -            |
| <i>Trichia varia</i>     | MdH-FR1210005 | 443 bp  | KM495011 | -            |
| <i>Trichia varia</i>     | sc22520       | 443 bp  | KM495025 | -            |
| <i>Trichia varia</i>     | sc27667c2     | 443 bp  | KM495027 | -            |
| <i>Trichia varia</i>     | sc27556c1     | 443 bp  | KM495026 | -            |
| <i>Trichia varia</i>     | sc27860c4     | 443 bp  | KM495022 | -            |
| <i>Trichia varia</i>     | sc27839       | 443 bp  | KM495010 | -            |
| <i>Trichia varia</i>     | sc27742       | 443 bp  | KM495009 | -            |
| <i>Trichia varia</i>     | sc22409       | 443 bp  | KM494999 | -            |
| <i>Trichia varia</i>     | AMDF451       | 443 bp  | KM495017 | -            |
| <i>Trichia varia</i>     | sc27664c1     | 443 bp  | KM495008 | -            |
| <i>Trichia varia</i>     | JVR848        | 482 bp  | KM494996 | DR-P2        |
| <i>Trichia varia</i>     | sc27850c2     | 443 bp  | KM495029 | -            |
| <i>Trichia varia</i>     | sc27507       | 443 bp  | KM495023 | -            |
| <i>Trichia varia</i>     | sc27745       | 443 bp  | KM495012 | -            |
| <i>Trichia varia</i>     | sc27648c1     | 443 bp  | KM495024 | -            |
| <i>Trichia varia</i>     | sc27850c1     | 443 bp  | KM495021 | -            |
| <i>Trichia varia</i>     | sc22370       | 1145 bp | KM494993 | HEG-P2; I-50 |
| <i>Trichia varia</i>     | sc27772c3     | 443 bp  | KM495013 | -            |
| <i>Trichia varia</i>     | sc22556       | 443 bp  | KM495007 | -            |
| <i>Trichia varia</i>     | sc27697       | 443 bp  | KM495006 | -            |
| <i>Trichia varia</i>     | sc22517       | 443 bp  | KM495005 | -            |
| <i>Trichia varia</i>     | LE256579      | 443 bp  | KM495031 | -            |
| <i>Trichia varia</i>     | LE259461      | 1145 bp | KM494995 | HEG-P2; I-50 |
| <i>Trichia varia</i>     | LE259268      | 1145 bp | KM494994 | HEG-P2; I-50 |

**Order: Trichiales; Family: Dianemataceae**

|                       |         |        |          |   |
|-----------------------|---------|--------|----------|---|
| <i>Dianema nivale</i> | MM29888 | 538 bp | JX481289 | - |
|-----------------------|---------|--------|----------|---|

**Order: Echinosteliales; Family: Echinosteliaceae**

|                                    |               |         |          |              |
|------------------------------------|---------------|---------|----------|--------------|
| <i>Echinostelium coelocephalum</i> | ATCC MYA-2984 | 1136 bp | AY842033 | HEG-P2; I-59 |
|------------------------------------|---------------|---------|----------|--------------|

---

**Table S2**

Key features of direct repeat arrays in myxomycete S516 introns.

| DR region | S516 intron <sup>1</sup>                     | Motif <sup>2</sup> | Copy no | Heterogeneity <sup>2</sup> |
|-----------|----------------------------------------------|--------------------|---------|----------------------------|
| P1        | <i>Comatracha anastomosans</i> - JQ031961    | ca 110 nt          | 4       | +                          |
|           | <i>Comatracha pseudoalpina</i> - DQ903673    | ca 110 nt          | 4       | +                          |
| P2        | <i>Comatracha nigricapillitia</i> - AY643824 | 4 nt               | 4       | -                          |
|           | <i>Lamproderma album</i> - JQ031971          | ca 220 nt          | 2       | +                          |
|           | <i>Lamproderma columbinum</i> - HQ687204     | ca 20 nt           | 5       | +                          |
|           |                                              | ca 40 nt           | 3       | +                          |
|           |                                              | 23 nt              | 25      | +                          |
|           | <i>Licea parasitica</i> - JX481297           | 14 nt              | 2       | +                          |
|           | <i>Trichia varia</i> - KM494996              |                    |         |                            |
| P5        | <i>Comatracha pseudoalpina</i> - DQ903673    | ca 60 nt           | 2       | +                          |
| P6        | <i>Elaeomyxa cerifera</i> - JQ031967         | 11 nt              | 4       | +                          |
|           |                                              | 10 nt              | 6       | +                          |
|           |                                              | Ca 80 nt           | 2       | +                          |
| P8        | <i>Colloderma oculatum</i> - JQ031959        | ca 120 nt          | 2       | +                          |
|           | <i>Lamproderma columbinum</i> - HQ687196     | ca 12 nt           | 5       | +                          |
|           |                                              | 10 nt              | 2       | +                          |
| P9        | <i>Lamproderma columbinum</i> - HQ687204     | 28 nt              | 2       | +                          |
|           | <i>Lamproderma columbinum</i> - HQ687200     | 9                  | 3       | +                          |

Notes:

<sup>1)</sup> More detailed information about the S516 introns is provided in Tabel S1.<sup>2)</sup> Motif sequences and heterogeneity are presented in Figure S8.
